# Supplementary material for: Telerehabilitation of acute musculoskeletal multi-disorders: prospective, single-arm, interventional study
Source: PubMed Central journal article supplement (PMC8728982; doi:10.1186/s12891-021-04891-5), 2022-01-04
Supplement: 12891_2021_4891_MOESM2_ESM.pdf [file 12891_2021_4891_MOESM2_ESM.pdf]

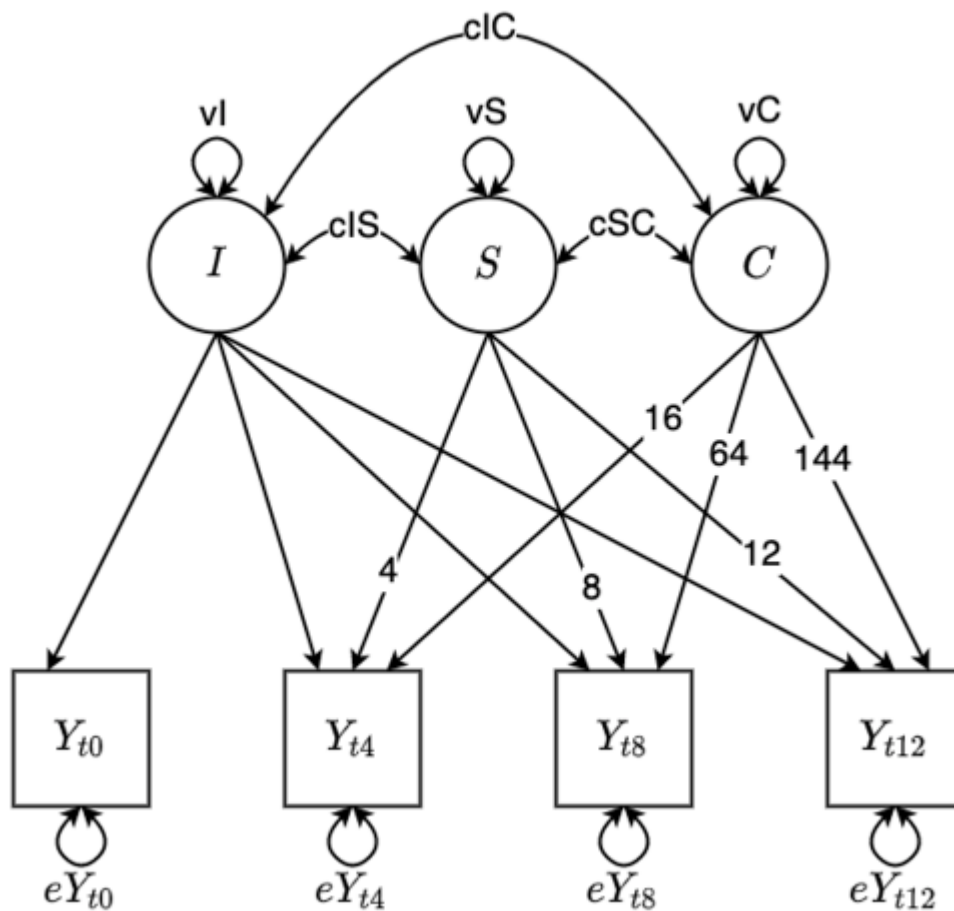

Supplementary Figure 1. Example path diagram for the LGC models used in the current study. LGCs are a form of structural equation model for modeling longitudinal processes. Squares represent outcome variables at baseline, 4 weeks, 8 weeks, and 12 weeks. Circles represent average latent intercept (*I*), slope (*S*), and curvature (*C*) components across all participants. Single-headed arrows represent fixed loadings relating the outcome variables to the latent components. Double-headed arrows represent either variance, covariance, or error variance parameters.

Latent growth curve (LGC) models take the form:

$$Y_{ij} = I + St_i + Ct_i + u_{Ij} + u_{Sj}t_i + u_{Cj}t_i + e_{ij}$$

where *Y* is the outcome score for person, *j*, at time, *i*,  $t_i$  is a vector of time points representing [0, 4, 8, 12] weeks, *I* is an intercept term representing the average value at  $t=0$  for all

participants,  $S$  is a slope term representing the average linear change of  $Y_{ij}$  over time for all participants,  $C$  is a curvature term representing the quadratic change over time of  $Y_{ij}$  for all participants,  $u_{ij}$  is a random intercept term representing individual participant variation in  $I$ ,  $u_{sj}$  is a random slope term representing individual participant variation in  $S$ ,  $u_{cj}$  is a random curvature term representing individual participant variation in  $C$ , and  $e_{ij}$  is an error term (see Supplementary Figure 1).
